# Supplementary material
Source: Research Square preprint supplement (doi:10.21203/rs.3.rs-8695811/v1)
Supplement: Supplementary file 1 [file 9ac2dda10df46f99108bc950.xlsx]

## Sheet: Actors
No	Actor	Gender	Type of actor	Type of institution	Affiliation	Source	Country	Other region coverage	Region coverage	Fields	Sub-fields	Partnerships	Activities	Web site	Research agenda		Others
1	OECD		Institution	Cooperation		EVIPNet	International Institution			Agriculture and food Development Economics Finance and Investment Governance Social issues/Migration/health Taxation Trade Education Employment Energy Industry and services Nuclear energy Science and Technology Transport Urban rural and regional development		Country members Bilateral cooperation from country members			Research priorities established in a 5 year agenda		https://www.oecd-ilibrary.org/papers/2021?pageSize=60
2	CEPAL		Institution	Cooperation		EVIPNet	International Institution			SDG 2030 Gender Statistics International trade and integration Economic Development Social Development Sustainable Development and Human Settlements Planning for Development Population and development Natural Resources		LATAM Goverments Bilateral cooperation		https://www.cepal.org/es/acerca	In coordination with the Comission of State Members		https://www.cepal.org/es/catalogo-publicaciones
3	Hospital Italiano de Buenos Aires		Institution	Academic		EVIPNet, Cochrane	Argentina			Knowledge management	Pediatrics, medical treatments, policy		Systematic Reviews	https://instituto.hospitalitaliano.org.ar/#!/home/institucional/seccion/85431			https://instituto.hospitalitaliano.org.ar/#!/home/inviuhi/seccion/27112
4	McMaster University		Institution	Academic		EVIPNet	Canada				Infectious Diseases, Research Methods and Recommendations. Evidence-Informed Policy.	Public Health Social Systems SDG		https://www.mcmasterforum.org/lets-collaborate/overview			https://www.mcmasterforum.org/docs/default-source/resources/10-year-report_web.pdf
5	John Lavis	M	Researcher	Academic	Mc Master University	EVIPNet, Cochrane	Canada				Health policy Social policy	McMaster University WHO		https://experts.mcmaster.ca/display/lavisj
7	Juan Pablo Peña Rosas	M	Researcher	Technical		Cochrane					Nutrition Health Policy Systematic Review	WHO Emory University Cornell University		https://apps.who.int/nutrition/about_us/penarosas/en/index.html
8	Paul Garner	M	Researcher	Academic		Cochrane	UK				Systematic Reviews Health Policy	LSTM		https://www.lstmed.ac.uk/about/people/professor-paul-garner
9	Luz Maria de Regil	F	Researcher	Technical		Cochrane	Brazil				Nutrition Surveillance Systems Monitoring tools Children Health	WHO
10	Institute of Health Effectiveness and Health Policy		Institution	Academic		INAHTA	Argentina				Rapid Responses Technical Short Reports Systematic Reviews Economic Evaluations	WHO Cochrane CERTC Fogarty International Center INCLEN CESCAS NIH NHLBI		https://www.iecs.org.ar/evaluacion-de-tecnologias-sanitarias-y-economia-de-la-salud/agencia-de-evaluacion-de-tecnologias-sanitarias/
11	Instituto de Evaluación Tecnológica en Salud		Institution	Academic		INAHTA	Colombia				Economic Evaluation in health Efectiveness and Security Evaluation Impact evaluation Health Policy	Cochrane Ministry of Health of Colombia National Institute of Health ASCOFAME		https://www.iets.org.co/
12	Tomas Pantoja	M	Researcher	Academic		Cochrane, Universidad Católica de Chile	Chile				Systematic Reviews Healt Policy KTP Evaluation	PUC Chile McMaster Health Forum		https://medicina.uc.cl/persona/dr-tomas-pantoja/
13	Ulysses de Barros Panisset	M	Researcher	Academic		Cochrane	Brazil				EIPM Diplomacy in Health Health Policy	EVIPNet University of Minas Gerais		http://somos.ufmg.br/professor/ulysses-de-barros-panisset
14	Jorge Barreto	M	Researcher	Academic		Cochrane	Brazil				EIPM PHC Health Tecnologies Assessment	FIOCRUZ WHO	Systematic Reviews, Reviews, deliverative dialogues	https://www.researchgate.net/profile/Jorge-Otavio-Maia-Barreto-2
15	Marcela Velez	F	Researcher	Academic	Mc Master University, University of Antioquia	Journal	Colombia	LATAM,		knowledge translation	SDG, Public Health, Medicine		Systematic Reviews
16	Ivan D. Florez	M	Researcher	Academic	Mc Master University, University of Antioquia	Journal	Colombia			knowledge translation	SDG, Public Health, Medicine		Systematic Reviews
17	Grupo Académico de Epidemiología Clínica (GRAEPIC)		Institution	Academic	Cochrane, Universidad de Antioquia	Journal	Colombia						Systematic Reviews				Although they say they do SR, they do not actually have any.
18	Daniel Patiño Lugo	M	Researcher	Academic	Universidad de Antioquia	LATAM Hub	Colombia			knowledge translation	SDG, Public Health, Medicine		Systematic Reviews
19	Lucy Khun	F	Researcher	Academic	Ministry of Health	LATAM Hub	Chile						Systematic Reviews
20	Daniel Maceira	M	Researcher	Academic	CEDES, CONICET	HSG	Argentina				Health Economics, Health Policy
21	Cristian Mancilla	M	Researcher	Academic	Mc Master University	LATAM Hub	Chile
22	Cristian Herrera	M	Researcher	Technical	World Bank	LATAM Hub	Chile				health policy and systems research, knowledge translation		Systematic Reviews, deliberative dialogues, research
23	Laura Boeira	F	Researcher	Academic	Institute Veredas	LATAM Hub	Brazil
24	Daniela Rodriguez	F	Researcher	Academic	John Hopking University	LATAM Hub	Argentina
25	Nora Reyes	F	Researcher	Academic	Instituto Nacional de Salud	LATAM Hub	Chile
26	Instituto Nacional de Salud		Institution	Technical		Web Page	Chile						Policy brief, systematic reviews	https://web.ins.gob.pe/es/salud-publica/-unidad-de-analisis-y-generacion-de-evidencias/presentacion
27	Comisión Nacional de Evaluación de Tecnologías de Salud		Institution	Technical	Ministry of Health	EVIPNet	Argentina						Priority setting, deliberative dialogues, policy briefs	https://www.argentina.gob.ar/salud/conetec
28	National Scientific and Technical Research Council (CONICET)		Institution	Technical	Ministry of Health	Web Page	Argentina			Agrarian, Engineering and Material Sciences Biological and Health Sciences Exact and Natural Sciences Social Sciences and the Humanities	human health, pharmaceutical and biotech, food industry, animal and plant production and health, nanoscience, nanomaterials, materials science and industrial Technologies, clean energy, biofuels, industrial equipment, communications and software.			https://www.conicet.gov.ar/technology-transfer-office/?lan=en
29	María Eugenia Esandi	F	Researcher	Academic	Universidad Nacional del Sur	Web Page	Argentina						Deliberative dialogues
30	Zulma Orti	F	Researcher	Academic	Epidemiological Research Institute,	Web Page	Argentina						Deliberative dialogues
31	Bermuda Health Council		Institution	Technical	Ministry of Health	LATAM Hub	Bermuda			HTA			Evaluations	https://bhec.bm/health-technology-reviews/
32	Argentina Public Network of Health Technology Assessment (RedArets)		Institution	Technical		Cochrane Iberoamericano	Argentina			Knowledge Translation	Health systems research, health technology assessment			http://www.redarets.com.ar/index.php/quienes-somos/reglamento
33	Edgardo Ábalos	M	Researcher	Technical	CREP		Argentina			Knowledge Translation	policies evidence-informed health practices, maternal health, perinatal health			https://www.researchgate.net/profile/Edgardo-Abalos
34	Evelina Chapman	F	Researcher	Academic	Oswaldo Cruz Foundation		Brazil	Argentina		Knowledge translation, Clinical trials, political networks, public health, epidemiology			reviews, systematic reviews,	https://www.researchgate.net/profile/Evelina-Chapman
35	Centro de evaluación de políticas basadas en la evidencia (CEPE)		Institution	Academic	Universidad Torcuato di tella	LATAM Hub	Argentina			Knowledge translation	public policy
36	Global Governance Research-to-Practice Lab		Institution	Academic	University of McGill	EVIPNet	Canada	LATAM	Southern Hemisphere	Knowledge Translation	Corruption, media, politics, poverty		Reviews, analysis	http://globalgovernance.lab.mcgill.ca/projects/
37	Laboratorio Tecnologico del Uruguay (LATU)		Institution	Technical		EVIPNet	Uruguay			Technology, production, innovation, TIC			Research, deliberative dialogues*
38	Health Assessment Division/Ministry of Public Health		Institution	Technical		Redetsa	Uruguay			HTA			Evaluations	https://www.inahta.org/
39	National Resources Fund (FNR)		Institution	Technical		Redetsa/Cochrane/IHME	Uruguay			HTA, evaluation			Evaluations	http://www.fnr.gub.uy/mision
40	University of the West Indies		Institution	Academic		EVIPNET/LATAM Hub	Trinidad and Tobago				SDG, Knowledge brokerage			https://pubmed.ncbi.nlm.nih.gov/11824011/
41	Caribbean Centre for Health Systems Research (CCHRSD)		Institution	Academic	West Indies University	PEERSS	Trinidad and Tobago				SDG, Knowledge brokerage	public health	rapid reviews, deliberative dialogues,	https://sta.uwi.edu/cchsrd/
42	Caribbean Public Health Agency (CARPHA)		Institution	Academic		LATAM Hub	Trinidad and Tobago			Environment, research system, public health, nnutrition			reports	https://carpha.org/What-We-Do/Health-Information
43	Unidad de Evidencia y Deliberación para la Toma de decisiones		Institution	Academic	Universidad de Antioquia	LATAM Hub	Colombia			knowledge translation	SDG, Public Health, Medicine		Systematic Reviews, policy notes	https://www.udea.edu.co/wps/portal/udea/web/inicio/unidades-academicas/medicina/investigacion/unidad-evidencia-deliberaci%C3%B3n-toma-decisiones
44	Pontificia Universidad Javeriana		Institution	Academic	EVIPNet/Cochrane	EVIPNet	Colombia			Public Health, Education, Environment	Epidemiology		Systematic Review	https://es.cochrane.org/news/diplomado-de-revisiones-sistematicas-de-la-literatura-y-meta-analisis-en-bogota			There is evidence they are actors, but it is not specific in their web page
45	Universidad Nacional de Colombia		Institution	Academic	Cochrane	Cochrane	Colombia			development			Deliberative Dialoques	https://revistas.uexternado.edu.co/index.php/sotavento/article/view/4690/5657			There is only a document which explains its role in EIP, but not much more.
46	Observatorio Colombiano de Migración desde Venezuela		Institution	Technical	Goverment of Colombia	LATAM Hub	Colombia			Migration			Reviews, reports	https://www.dnp.gov.co/DNPN/observatorio-de-migracion/Paginas/estudios.aspx
47	Natura		Institution	Technical		LATAM Hub	Colombia			Environment			Deliberative Dialoques	https://natura.org.co/
48	Instituto Nacional de Salud de los Trabajadores		Institution	Technical	Ministry of Health		Cuba			Labor Health			Reviews, reports	https://www.ecured.cu/Instituto_Nacional_de_Salud_de_los_Trabajadores			They are aprt of the MoH and makes evaluations too
49	Universidad de la Habana		Institution	Academic		EVIPNet	Cuba			Medicine, biology, law, agriculture				https://www.uh.cu/sites/default/files/public/adjuntos/proyectos_en_programas_nacionales_uh_2018.pdf			In Cuba universities are very close to Govermnent
50	Pedro Más Bermejo	M	Researcher	Academic	Instituto de Medicina Tropical “Pedro Kourí” (IPK), UCL	Cochrane	Cuba			Public health, health policy, epidemiology			Deliberative Dialoques	https://www.researchgate.net/profile/Pedro-Bermejo-4
51	University of the West Indies		Institution	Academic		EVIPNET/LATAM Hub	Jamaica				SDG, Knowledge brokerage
52	Instituto de Salud Pública		Institution	Technical	Ministry of Health	EVIPNET	Chile					EVIPNet	Systematic Reviews, Reviews, deliverative dialogues
53	Pontificia Universidad Católica de Chile		Institution	Academic		LATAM Hub	Chile					EVIPNet	Systematic Reviews, Reviews, deliverative dialogues
54	Observatorio de políticas públicas en actividad física y alimentación		Institution	Academic		Universidad de Santiago de Chile	Chile			EIP	Physical Activity, Nutrition	EVIPNet	Systematic Review, research, deliberative dialogues
55	Comisión Nacional de Evaluación de Tecnologías de Salud (CONETEC)		Institution	Technical	Ministry of Health	Redetsa	Argentina			Knowledge translation	HTA			https://www.argentina.gob.ar/salud/conetec#:~:text=La%20Comisi%C3%B3n%20Nacional%20de%20Evaluaci%C3%B3n,cobertura%20de%20las%20tecnolog%C3%ADas%20sanitarias.
56	Fundación ARU		Institution	Technical		Network	Bolivia			Economics, social policy			Reports, research	https://www.aru.org.bo/
57	Nucleo milenio		Institution	Technical	Ministry of Economics	Web page	Chile			Health economics, education, labor		Universidad Católica de Chile, Universidad Alberto Hurtado	Policy briefs, systematic reviews	https://nucleodesoc.cl/
58	BID - InterAmerican Development Bank		Institution	Cooperation		Network	International Institution			SDG 2030 Gender Statistics International trade and integration Economic Development Social Development Sustainable Development and Human Settlements Planning for Development Population and development Natural Resources		LATAM Goverments Bilateral cooperation		https://www.iadb.org/en/environment/Open-IEEM-Platform
59	USAID		Institution	Cooperation		Network	International Institution			SDG 2030 Gender Statistics International trade and integration Economic Development Social Development Sustainable Development and Human Settlements Planning for Development Population and development Natural Resources		LATAM Goverments Bilateral cooperation		https://infosegura.org/quienes-somos-infosegura/	https://www.edx.org/course/what-works-in-education-evidence-based-education-p
60	Centro de Investigación y Docencia en Educación		Institution	Academic	Universidad Nacional (UNA)	LATAM Hub	Costa Rica			Education, Childhood			Research, deliberative dialogues*	https://www.cide-ineina.una.ac.cr/index.php/resena-historica			It is not specific on deliberative dialogues
61	Instituto Internacional de Conservación y Manejo de Vida Silvestre		Institution	Academic	Universidad Nacional (UNA)	LATAM Hub	Costa Rica			Wildlife, conservation			Research, deliberative dialogues*	http://www.icomvis.una.ac.cr/index.php/servicios-2			It is not specific on deliberative dialogues
62	Centro de Investigación en Cuidado de Enfermería y Salud (CICES)		Institution	Academic	Universidad de Costa Rica	LATAM Hub	Costa Rica			Health			Research	https://vinv.ucr.ac.cr/es/unidades/centro-de-investigacion-en-cuidado-de-enfermeria-y-salud-cices
63	Llacta Lab		Institution	Academic	Universidad de la Cuenca	Network	Ecuador			Urbanism, climate change			Research, deliberative dialogues*	https://llactalab.ucuenca.edu.ec/publicaciones/
64	Fundação Oswaldo Cruz (FIOCRUZ)		Institution	Technical		LATAM Hub	Brazil
65	INSPER		Institution	Academic		LATAM Hub	Brazil			Public Policy	Economics, agriculture, SDG,
66	Escola Nacional de Administração Pública - ENAP		Institution	Academic	inistry of Planning, Budget and Management	Network	Brazil			Knowledge Translation	Corruption, transport, communicatons		Training, reviews, deliberative dialogues, maps, research	https://enap.gov.br/pt/servicos/apoio-a-transformacao-governamental
67	University of Sao Paulo		Institution	Academic		LATAM Hub	Brazil
68	Tamille Diaz	F	Researcher	Technical	ENAP	Network	Brazil			Knowledge translation			Systematic reviews, training
69
70
71
72
73
74
75
76
77
78
79
80
81
82
83
84
85
86
87
88
89
90
91
92
93
94

## Sheet: Terms
	TOTAL	Health policy	Public environmental occupational health	Health care sciences	Rehabilitation	Medicine General	Multisciplinary social sciences	Pediatrics	Education special	Economics	Enviromental sciences	business and management	Agricultural	Public administration	Development	water sciences	Biodiversity	Energy/sustainable technology	Other	Science and Technology
Evidence based	146	33	15	20								11						3	64	2
Evidence informed	53	18	14						1	1	1								18
Knowledge translation	45	19	10	9	3	2	2	2	1										-3
Knowledge based	34	16	9				2		1										6
Research based	33								2	2		10	1						18	3
Use of evidence	33	8	13							2	1								9
Science based	32										13					11	4		4
Knowledge exchange	20										19		1						0
Science-policy interface	18										20							1	-3
Science communication	11						1				5					1			4
Knowledge uptake	9	3	2	1							7								-4
Evidence use	8	2																	6
Research use	8	3	2							1		1		1	1				-1
Research utilization	5	2							2										1
Science diplomacy	5										1				1				3
Knowledge mobilisation	4						1		1		1								1
Knowledge brokering	4										3								1
Knowledge informed	1																		1
Research to action	1																		1
Evidence to action	1	1																	0
		105	65	30	3	2	6	2	8	6	71	22	2	1	2	12	4	4	126	5
Evidence based		0.314286	0.230769	0.666667	0	0	0	0	0	0	0	0.5	0	0	0	0	0	0.75	0.507937	0.4
Evidence informed		0.171429	0.215385	0	0	0	0	0	0.125	0.166667	0.0140845	0	0	0	0	0	0	0	4.5	0
Knowledge translation		0.180952	0.153846	0.3	1	1	0.333333	1	0.125	0	0	0	0	0	0	0	0	0	-0.75	0
Knowledge based		0.152381	0.138462	0	0	0	0.333333	0	0.125	0	0	0	0	0	0	0	0	0	1.5	0
Research based		0	0	0	0	0	0	0	0.25	0.333333	0	0.454545	0.5	0	0	0	0	0	4.5	0.75
Use of evidence		0.0761905	0.2	0	0	0	0	0	0	0.333333	0.0140845	0	0	0	0	0	0	0	2.25	0
Science based		0	0	0	0	0	0	0	0	0	0.183099	0	0	0	0	0.916667	1	0	1	0
Knowledge exchange		0	0	0	0	0	0	0	0	0	0.267606	0	0.5	0	0	0	0	0	0	0
Science-policy interface		0	0	0	0	0	0	0	0	0	0.28169	0	0	0	0	0	0	0.25	-0.75	0
Science communication		0	0	0	0	0	0.166667	0	0	0	0.0704225	0	0	0	0	0.0833333	0	0	1	0
Knowledge uptake		0.0285714	0.0307692	0.0333333	0	0	0	0	0	0	0.0985915	0	0	0	0	0	0	0	-1	0
Evidence use		0.0190476	0	0	0	0	0	0	0	0	0	0	0	0	0	0	0	0	1.5	0
Research use		0.0285714	0.0307692	0	0	0	0	0	0	0.166667	0	0.0454545	0	1	0.5	0	0	0	-0.25	0
Research utilization		0.0190476	0	0	0	0	0	0	0.25	0	0	0	0	0	0	0	0	0	0.25	0
Science diplomacy		0	0	0	0	0	0	0	0	0	0.0140845	0	0	0	0.5	0	0	0	0.75	0
Knowledge mobilisation		0	0	0	0	0	0.166667	0	0.125	0	0.0140845	0	0	0	0	0	0	0	0.25	0
Knowledge brokering		0	0	0	0	0	0	0	0	0	0.0422535	0	0	0	0	0	0	0	0.25	0
Knowledge informed		0	0	0	0	0	0	0	0	0	0	0	0	0	0	0	0	0	0.25	0
Research to action		0	0	0	0	0	0	0	0	0	0	0	0	0	0	0	0	0	0.25	0
Evidence to action		0.00952381	0	0	0	0	0	0	0	0	0	0	0	0	0	0	0	0	0	0

## Sheet: Database
No	Actor	Type of actor	Type of institution	Country	Affiliation	Policy domains	Policy domains grouped	Field	Sub Field	Source	A.Location	B.Focus	C.Partnership	D.Products	E.Activities	Comments	Criteria
355	Al Sur	Institution	Technical	LATAM				Digital Rights		Network	YES	NO	YES	NO	NO	Platform, not clear activities or products.	NO
354	Coalizao Brasileria pelas Evidencias	Institution	Technical	#VALUE!				Public Policy	Knowledge Translation	LAC Hub	YES	YES	YES	NO	NO	Platform, not clear activities or products.	YES
353	Observatorio Nacional de la Violencia	Institution	Academic	#VALUE!	Universidad Nacional Autónoma de Honduras (UNAH)			Seguridad Ciudadana		Network	YES	YES	YES	YES	.		YES
352	Instituto de Investigaciones Sociales (IIS)	Institution	Academic	#VALUE!	Universidad Nacional Autónoma de Honduras (UNAH)			Ciencias Sociales		Network	YES	NO	NO	NO	.	Not focused on policy but evidence only.	NO
351	Observatorio Universitario en Seguridad Alimentaria y Nutricional (Obsan)	Institution	Academic	#VALUE!	Universidad Nacional Autónoma de Honduras (UNAH)			Seguridad alimentaria y nutricional		Network	YES	YES	YES	YES	.		YES
350	Instituto Universitario en Democracia, Paz y Seguridad (IUDPAS)	Institution	Academic	#VALUE!	Universidad Nacional Autónoma de Honduras (UNAH)			Seguridad Ciudadana, democracia	Juventudes	Network	YES	YES	YES	YES	.		YES
349	Damien King	Researcher	Academic	#VALUE!						LAC Hub	YES	YES	YES	YES	.		YES
348	Caribbean Policy Research Institute	Institution	Think Tank	#VALUE!						LAC Hub	YES	YES	YES	YES	YES		YES
347	Bloomsbury Policy Group	Institution	Academic	#VALUE!						Network	YES	YES	YES	NO	YES		YES
346	Ivan Flores	Researcher	Academic	#VALUE!	COVID-End					LAC Hub	YES	YES	YES	YES	.		YES
345	Donald Simeon	Researcher	Academic	#VALUE!	CCHRSD					LAC Hub	YES	YES	YES	YES	YES		YES
344	Global Commission on Evidence	Institution	Academic	#VALUE!	McMaster University					LAC Hub	YES	YES	YES	YES	YES		YES
343	KAS	Institution	Cooperation	#VALUE!				Development	Entrepeneurship, gender, democracy		YES	NO	YES	YES	YES		NO
342	FICOSEC	Institution	Private-Public	#VALUE!						LAC Hub	YES	NO	YES	YES	YES	But trying to get into policy	NO
341	J-PAL Brasil	Institution	Technical	#VALUE!						LAC Hub	YES	YES	YES	YES	YES		YES
340	J-PAL Americas	Institution	Technical	#VALUE!						LAC Hub	YES	YES	YES	YES	YES		YES
339	SDSN Andes	Institution	Cooperation	#VALUE!				Environment, SDG		Network	YES	NO	YES	.	YES		NO
338	SDSN Amasonia	Institution	Cooperation	#VALUE!						Network	YES	NO	.	.	YES		NO
337	SDSN Bolivia	Institution	Think Tank	#VALUE!				SDG	Environment, tourism, labor	Network	YES	YES	YES	NO	YES		YES
336	Nicolás Brener	Decision maker	Public	#VALUE!						Network	YES	YES	NO	NO	YES		YES
335	Agustín Iturralde	Researcher	Academic	#VALUE!						Network	YES	YES	YES	YES	YES		YES
334	Antonio Manzi	Decision maker	Public	#VALUE!						Network	YES	YES	.	YES	YES		YES
333	Constanza Gonzalez Parrao	Researcher	Technical	#VALUE!						LAC Hub	YES	YES	.	YES	YES		YES
332	Veronica Mendes Abdala	Researcher	Technical	#VALUE!	IPEA					LAC Hub	YES	YES	.	YES	YES		YES
331	Soledad Quiroz	Researcher	Technical	#VALUE!						LAC Hub	YES	YES	.	YES	.		YES
330	Natalia Massaco Koga	Researcher	Technical	#VALUE!	IPEA					LAC Hub	YES	YES	.	YES	YES		YES
329	Ludovic Reveiz	Researcher	Technical	#VALUE!	PAHO					LAC Hub	YES	YES	YES	YES	YES		YES
328	Roberta Borges Silva	Researcher	Public	#VALUE!	Ministry of Health			Health		LAC Hub	YES	YES	YES	.	YES		YES
327	Bloomsbury Policy Group	Institution	Academic	#VALUE!						Network	YES	YES	YES	NO	YES		YES
326	Universidade Federal do Paraná - UFPR	Institution	Academic	#VALUE!						LAC Hub	YES	.	.	.	.	No information	NO
325	Universidade Estadual de Feia de Santana - UEFP	Institution	Academic	#VALUE!						LAC Hub	YES	.	.	.	.	No information	NO
324	Universidade do Extremo Sul Cartarinense - UNESC	Institution	Academic	#VALUE!						LAC Hub	YES	.	.	.	.	No information	NO
323	Universidade de Pernambuco - UPE	Institution	Academic	#VALUE!						LAC Hub	YES	.	.	.	.	No information	NO
322	Travessia Políticas Públicas	Institution	Technical	#VALUE!				Public Policy	Knowledge Translation	LAC Hub	YES	YES	YES	YES	YES		YES
321	Superintendencia Estadual do Ministerio da Saúde na Bahia	Institution	Public	#VALUE!	Government of Bahia					LAC Hub	YES	.	.	.	.	No information	NO
320	Secretaria de Estado de Planejamiento do Piauí - Seplan/PI	Institution	Public	#VALUE!	Government of Piuai					LAC Hub	YES	.	.	.	.	No information	NO
319	Rede a ponte	Institution	Technical	#VALUE!				Democracy	Gender, Women's rights	LAC Hub	YES	YES	YES	YES	.		YES
318	Núcleo de Evidencias em Saúde Bucal - Faculdade de Odontologia da USP	Institution	Academic	#VALUE!	University of Sao Paulo			Oral health		LAC Hub	YES	YES	YES	YES	YES		YES
317	Nucleo de Evidencias do Ministerio do Saúde - Nev/MS	Institution	Public	#VALUE!	Ministry of health, EVIPNET			Health		LAC Hub	YES	YES	YES	YES	YES		YES
316	Núcleo de Evidencias da Prefeitura de Campo Grande - Nev/PMGG	Institution	Public	#VALUE!	Government of Campo Grande			Health		LAC Hub	YES	YES	YES	NO	NO		YES
315	Nucleo de avalizacao de tecnologias en Saude do Hospital da Clinicas da UFM/Ebserh - NATS/HC-UFMG/Ebserg	Institution	Public	#VALUE!	Ministry of Health, University of Minas Gerais			HTA, Health		LAC Hub	YES	NO	YES	NO	NO	Research related to policy, but not for policy	NO
314	Diretoria de Estudos e Politicas Sociais - DIPOS/DOCEPLAN	Institution		#VALUE!						LAC Hub	YES	.	.	.	.	No information	NO
313	Instituto de Saúde - EVIPNET	Institution	Public	#VALUE!						LAC Hub	YES	YES	YES	YES	YES		YES
312	Instituto Cíclica	Institution	NGO	#VALUE!				Human Rights, democracy	Youth	LAC Hub	YES	YES	NO	NO	YES		YES
311	Grupo Seriema - UNISO	Institution	Academic	#VALUE!	University of Sorocaba, EVIPNET					LAC Hub	YES	YES	YES	YES	.		YES
310	Frente Coletivo Carcelario	Institution	Civil	#VALUE!						LAC Hub	YES	.	.	.	.	No information	NO
309	Núcleo de Políticas Informadas por Evidências	Institution	Academic	#VALUE!	UFMG, EVIPNet			Public Health		LAC Hub	YES	YES	YES	.	.		YES
308	Faculdade de Enfermagem - UFMS	Institution	Academic	#VALUE!						LAC Hub	YES	.	.	.	.	No information	NO
307	Evidencias express EVEP/ENAP	Institution	Academic	#VALUE!				Public Policy	Knowledge Translation	LAC Hub	YES	YES	YES	YES	YES		YES
306	Public Health School of Ceara	Institution	Academic	#VALUE!				Public health		LAC Hub	YES	.	.	.	.	No information	NO
305	Easytelling	Institution	Academic	#VALUE!						LAC Hub	YES	YES	YES	.	.	Platform, not clear activities or products.	YES
304	Dados para um debate democratico na educaco (D3e)	Institution	Technical	#VALUE!				Education		LAC Hub	YES	YES	.	YES	YES		YES
303	Acompar - Acao comunitaria participativa	Institution		#VALUE!						LAC Hub	YES	.	.	.	.	No information	NO
302	On Think Tanks	Institution	Technical	International Institution	Climate change, Social protection, Inequality, Education and skills, Public finance					LAC Hub	YES	YES	YES	YES	YES		YES
301	Anima Education	Institution		#VALUE!				Education		LAC Hub	YES	NO	YES	.	.		NO
300	Beatriz Muriel	Researcher	Technical	#VALUE!	INESAD			Economics, public policy		Network	YES	YES	YES	YES	.		YES
299	Arachu Castro	Researcher	Technical	#VALUE!	Tulane University					Network	YES	NO	YES	YES	YES		NO
298	Santiago Farjat	Decision maker	Cooperation	#VALUE!	UNFPA			Population, reproductive health		Network	YES	YES	YES	YES	NO		YES
297	Diego Pemintel	Decision maker	Cooperation	#VALUE!	UNICEF			Children, education		Network	YES	YES	YES	YES	NO		YES
296	Jan Souverein	Researcher	Cooperation	#VALUE!	FES			Public Policy, economics		Network	YES	NO	YES	YES	YES		NO
295	Roland Pardo	Researcher	Public	#VALUE!	UDAPE			Economics, social policy		Network	YES	YES	YES	YES	NO		YES
294	Joaquín Morales	Researcher	Academic	#VALUE!	UPB			Economics		Network	YES	NO	YES	YES	YES	Not included	NO
293	Werner Hernani	Researcher	Academic	#VALUE!	Independent			Economics		Network	YES	.	YES	.	NO		NO
292	Pablo Rossell	Decision maker	Technical	#VALUE!	Independent			Public Polciy		Network	YES	NO	NO	NO	NO	Not included	NO
291	Lykke Andersen	Researcher	Academic	#VALUE!	SDSN			SDG	Environment, sustainable development	Network	YES	YES	YES	.	YES		YES
290	3ie	Institution	Technical	International Institution						LAC Hub	YES	YES	YES	YES	YES		YES
289	Valentina Illic	Researcher		#VALUE!						Network	YES	NO	YES	NO	NO	Not included	NO
288	Diego Vera	Researcher	Cooperation	#VALUE!	IADB			Economics, public policy	Cash transfers	Network	YES	NO	YES	YES	NO	Not included	NO
287	Diego Suarez	Researcher	Cooperation	#VALUE!	UNDP			Innovation, enterpreneurship		Network	YES	.	YES	.	YES		NO
286	CAF	Institution	Cooperation	International Institution						Network	YES	YES	YES	YES	YES		YES
285	Daniel Ortega	Researcher	Cooperation	#VALUE!	CAF					Network	YES	YES	YES	YES	YES		YES
284	Centro de Investigación en Cuidado de Enfermería y Salud (CICES)	Institution		#VALUE!	Universidad de Costa Rica					LAC Hub	YES	NO	.	.	.	No register of EIP, only research	NO
283	Instituto Internacional de Conservación y Manejo de Vida Silvestre	Institution	Academic	#VALUE!	Universidad Nacional (UNA)					EVIPNet	YES	YES	YES	.	YES	Need verification.	YES
282	Centro de Investigación y Docencia en Educación	Institution	Academic	#VALUE!	Universidad Nacional (UNA)					EVIPNet	YES	YES	YES	.	YES	Need verification.	YES
281	María N García Casal	Researcher		#VALUE!	SLAN					Cochrane	YES	NO	.	.	.	Evidence-based medicine	NO
280	PNUD	Institution	Cooperation	International Institution						Network	YES	YES	YES	YES	.	There are many institute inside it.	YES
279	USAID	Institution	Cooperation	International Institution						Network	YES	YES	YES	YES	.	There are many institute inside it.	YES
278	Daniela Rodriguez	Researcher	Academic	#VALUE!	John Hopkins University					Network	YES	YES	.	YES	.		YES
277	Luz Maria de Regil	Researcher	Technical	#VALUE!						LAC Hub	YES	YES	YES	YES	.		YES
276	Evelina Chapman	Researcher	Technical	#VALUE!						LAC Hub	YES	YES	YES	YES	.		YES
275	Laura Boeira	Researcher	Technical	#VALUE!						LAC Hub	YES	YES	YES	YES	.		YES
274	Jorge Barreto	Researcher	Technical	#VALUE!						LAC Hub	YES	YES	YES	YES	.		YES
273	Ulysses de Barros Panisset	Researcher	Cooperation	#VALUE!						LAC Hub	YES	YES	YES	YES	.		YES
272	National Agency for Research and Development	Institution	Public	#VALUE!	Ministry of Science, Technology and innovation					Web Page	YES	YES	YES	YES	.	.	YES
271	Instituto Nacional de Salud	Institution	Public	#VALUE!						LAC Hub	YES	YES	.	YES	.	.	YES
270	Nora Reyes	Researcher	Academic	#VALUE!	Instituto Nacional de Salud					LAC Hub	YES	YES	.	YES	YES		YES
269	Cristian Herrera	Decision maker	Cooperation	#VALUE!	World Bank					LAC Hub	YES	YES	.	YES	.		YES
268	Cristian Mancilla	Researcher	Academic	#VALUE!	Mc Master University					LAC Hub	YES	YES	.	YES	.		YES
267	Lucy Khun	Researcher	Public	#VALUE!	Ministry of Health					LAC Hub	YES	YES	.	YES	YES		YES
266	Tomas Pantoja	Researcher	Technical	#VALUE!	Universidad Católica de Chile					LAC Hub	YES	YES	.	YES	YES		YES
265	Tamille Diaz	Researcher	Technical	#VALUE!						Network	YES	YES	.	YES	.		YES
264	IMCO	Institution	Technical	#VALUE!				Competitividad	Public administration, Economics, Comerce, Education, Energy, Environment, Labor, Gender equality, corruption	Network	YES	YES	YES	.	YES		YES
263	DATA Lab	Institution		#VALUE!						Network	YES	.	.	.	.	Not policy oriented	NO
262	Llacta Lab	Institution	Academic	#VALUE!	Universidad de Cuenca					Network	YES	YES	.	.	YES		YES
261	KeroLAB	Institution		#VALUE!						Network	YES	NO	YES	.	.		NO
260	Martin Soto	Researcher		#VALUE!						Network	YES	NO	YES	NO	NO		NO
259	Caribbean Centre for Health Systems Research (CCHRSD)	Institution	Academic	#VALUE!						LAC Hub	YES	YES	YES	YES	YES		YES
258	Luis Gabriel Cuervo	Researcher	Cooperation	#VALUE!	PAHO					PAHO	YES	YES	YES	YES	YES		YES
257	Daniel Patiño Lugo	Researcher	Academic	#VALUE!	Universidad de Antioquia					LAC Hub	YES	YES	YES	YES	YES		YES
256	Grupo Académico de Epidemiología Clínica (GRAEPIC)	Institution	Academic	#VALUE!	Cochrane, Universidad de Antioquia						YES	YES	.	YES	.	They say they use SR but do not show any.	YES
255	Claudia Marcela Velez	Researcher	Academic	#VALUE!	Mc Master University, University of Antioquia					Network	YES	YES	YES	YES	.		YES
254	CIS	Institution	Public	#VALUE!						Network	YES	NO	.	YES	.		NO
253	Daniel Maceira	Researcher	Academic	#VALUE!				Global Health		Network	YES	YES	YES	YES	YES		YES
252	FES	Institution	Cooperation	#VALUE!						Network	YES	NO	.	.	.	Not included	NO
251	Zulma Ortiz	Researcher	Academic	#VALUE!	Academia Nacional de Medicina					Web Page	YES	YES	.	.	YES		YES
250	María Eugenia Esandi	Researcher	Academic	#VALUE!	Universidad Nacional del Sur, Bahía Blanca					Web Page	YES	YES	.	.	YES		YES
249	Marcelo García Diéguez	Researcher	Academic	#VALUE!	Universidad Nacional del Sur			Health		Web Page	YES	NO	.	.	.		NO
248	Ojino Sosa	Researcher		#VALUE!						LAC Hub	YES	NO	.	.	.		NO
247	Michelle Haby	Researcher	Academic	#VALUE!	Departamento de Ciencias Químico Biológicas					LAC Hub	YES	YES	YES	YES	.	Not much information	YES
246	Natura	Institution	NGO	#VALUE!						LAC Hub	YES	YES	.	.	YES		YES
245	Observatorio Colombiano de Migración desde Venezuela	Institution	Public	#VALUE!	Ministry of Planning					LAC Hub	YES	YES	YES	YES	.		YES
244	Centro de Investigación y Promoción del Campesinado - CIPCA	Institution	NGO	#VALUE!						LAC Hub	YES	NO	.	NO	YES	Hace investigación no especifica para EIP	NO
243	Fundación Construir	Institution	NGO	#VALUE!						LAC Hub	YES	NO	.	NO	YES	Hace investigación no especifica para EIP	NO
242	Caribbean Public Health Agency (CARPHA)	Institution	Academic	#VALUE!						LAC Hub	YES	YES	.	YES	.		YES
241	Observatorio de políticas públicas en actividad física y alimentación	Institution	Academic	#VALUE!						LAC Hub	YES	YES	.	YES	YES		YES
240	Fórum Brasileiro de Segurança Pública	Institution	NGO	#VALUE!				Security	Violence, accountability, crime, gender, youth	LAC Hub	YES	YES	YES	NO	.		YES
239	Fundação Bernard van Leer	Institution	Technical	#VALUE!				Urban planning		LAC Hub	YES	NO	YES	NO	YES	Research related to energy, not PIE.	NO
238	Câmara dos Deputados	Institution		#VALUE!						LAC Hub	YES	NO	.	.	.	Not included	NO
237	TCU - Tribunal de Contas das União	Institution	Public	#VALUE!						LAC Hub	YES	NO	YES	.	.	Technical research	NO
236	Senado Federal	Institution		#VALUE!						LAC Hub	YES	NO	.	.	.	Not included	NO
235	IJSN - Instituto Jones dos Santos Neves	Institution	Public	#VALUE!	Governo do Estado do Espirito Santo			Comerce, Urbanism, Economics, education, Youth, Security	Poverty, Labor	LAC Hub	YES	YES	YES	NO	.	Not clear about KT	YES
234	BID - InterAmerican Development Bank	Institution	Cooperation	International Institution						LAC Hub	YES	YES	YES	Yes	YES	There are many institutes inside it. Ask Diego Vera	YES
233	ANEEL - Agência Nacional de Energia Elétrica	Institution	Public	#VALUE!	Ministry of Mines and energy				Technology	LAC Hub	YES	NO	YES	NO	.	Research related to energy, not PIE.	NO
232	BNDES - Banco Nacional de Desenvolvimento	Institution	Public	#VALUE!	Ministry of Economics			Finances, economy		LAC Hub	YES	NO	YES	.	.	Research related to economy and finances, not PIIE	NO
231	GIFE - Grupo de Institutos, Fundações e Empresas	Institution	Technical	#VALUE!				Sustainable development.	Youth, Race, investment	LAC Hub	YES	YES	.	YES	.	Platform, not clear activities or products.	YES
230	Instituto Nacional de Ciencias Medicas y Nutricion	Institution	Academic	#VALUE!						LAC Hub	YES	YES	.	YES	.		YES
229	Instituto de Investigaciones socio-economicas (IISEC)	Institution	Academic	#VALUE!	UCB					LAC Hub	YES	NO	.	NO	YES	Hace investigación no especifica para EIP	NO
228	University of the West Indies	Institution	Academic	#VALUE!						EVIPNET/LAC Hub	YES	YES	YES	.	.	It is located in many caribbean countries and its activities are not specified.	YES
227	Fundación ARU	Institution	Academic	#VALUE!						LAC Hub	YES	YES	.	YES	.		YES
226	Agencia de los Estados Unidos para el Desarrollo Internacional (USAID) y el PNUD - Carisecure	Institution		#VALUE!						LAC Hub	NO	YES	.	.	.	It is not for governments of LATAM, just for USAID	NO
225	Centro Agronómico Tropical de Investigación y Enseñanza (CATIE)	Institution		#VALUE!						LAC Hub	YES	.	YES	.	.	No register of EIP, only research	NO
224	Universidad de Costa Rica	Institution		#VALUE!						LAC Hub	YES	.	YES	.	.	(Sistema de Integracion Centroamericana) Need more information	NO
223	Instituto Mixto de Ayuda Social (IMAS)	Institution		#VALUE!						LAC Hub	YES	NO	NO	.	.	No register of EIP, only research	NO
222	CODEPLAN - Companhia de Planejamento do Distrito Federal	Institution	Public	#VALUE!						LAC Hub	YES	NO	NO	.	.	Research related to policy, but not for policy	NO
221	Centro de evaluación de políticas basadas en la evidencia (CEPE)	Institution	Academic	#VALUE!	Universidad Torcuato di Tela					LAC Hub	YES	YES	.	YES	.		YES
220	Instituto Nacional de Estudos e Pesquisas Educacionais - INEP	Institution	Public	#VALUE!	Ministry of Education			Education	Terciary education	LAC Hub	YES	YES	YES	.	.		YES
219	Instituto Igarapé	Institution	Think Tank	#VALUE!				Security, climate change, digital security	Development	LAC Hub	YES	YES	YES	NO	.		YES
218	Fundação Maria Cecília Souto Vidigal	Institution	Technical	#VALUE!				Early Childhood	Education, health	LAC Hub	YES	YES	YES	YES	.		YES
217	Escola Nacional de Administração Pública - ENAP	Institution	Academic	#VALUE!						LAC Hub	YES	YES	YES	YES	YES		YES
216	Conselho de Monitoramento e Avaliação de Políticas Públicas - CMAP/SAGI	Institution	Public	#VALUE!	Ministry of Economics			Economics		LAC Hub	YES	YES	YES	.	.	Monitoring and Evaluation	YES
215	Itáu Social	Institution	NGO	#VALUE!				Education	Technologies	LAC Hub	YES	YES	YES	YES	YES		YES
214	INSPER	Institution	Academic	#VALUE!						LAC Hub	YES	YES	YES	YES	NO		YES
213	Instituto de Pesquisa Econômica Aplicada - IPEA	Institution	Academic	#VALUE!						LAC Hub	YES	YES	YES	NO	NO		YES
212	José Mordán	Researcher		#VALUE!	Ministerio de Salud Pública					Cochrane Iberoamericano	YES	NO	.	.	.	Evidence-based medicine	NO
211	Andelys de la Rosa	Researcher		#VALUE!	Ministerio de Salud Pública					Cochrane Iberoamericano	YES	NO	.	.	.	Evidence-based medicine	NO
210	Ministerio de Salud Pública	Institution		#VALUE!						Cochrane Iberoamericano	YES	NO	.	.	.	Not included	NO
209	Pedro Más Bermejo	Institution	Academic	#VALUE!	Instituto de Medicina Tropical “Pedro Kourí”					Cochrane Iberoamericano	YES	YES	.	.	YES		YES
208	Mario Tristan	Researcher		#VALUE!	Instituto Centroamericano de Salud Internacional					Cochrane Iberoamericano	YES	NO	YES	.	.	Evidence-based medicine	NO
207	Instituto Centroamericano de Salud Internacional	Institution		#VALUE!						Cochrane Iberoamericano	YES	NO	YES	.	.	Medicine oriented, not related to policy	NO
206	Oscar Gianneo	Researcher		#VALUE!	Fondo Nacional de Recursos					Cochrane Iberoamericano	YES	NO	.	YES	NO	Evidence-based medicine	NO
205	Carlos M. Rios González	Researcher		#VALUE!	Universidad Nacional de Caaguazú					Cochrane Iberoamericano	YES	NO	.	NO	.	Medicine oriented, not related to policy	NO
204	Universidad Nacional de Caaguazú	Institution		#VALUE!						Cochrane Iberoamericano	YES	NO	.	NO	.	Hace investigación no especifica para EIP	NO
203	Universidad de Valparaíso	Institution		#VALUE!						Cochrane Iberoamericano	YES	NO	.	.	.	Evidence based medicine	NO
202	Julio Villanueva Maffei	Researcher		#VALUE!	Facultad de Odontología de la Universidad de Chile					Cochrane Iberoamericano	YES	NO	.	.	.	Evidence based medicine	NO
201	Facultad de Odontología de la Universidad de Chile	Institution		#VALUE!						Cochrane Iberoamericano	YES	NO	.	.	.	Evidence based medicine	NO
200	Pamela Jeannette del Carmen Serón Silva	Researcher		#VALUE!	Universidad de La Frontera (UFRO)					Cochrane Iberoamericano	YES	NO	.	.	.	Evidence based medicine	NO
199	Universidad de La Frontera (UFRO)	Institution		#VALUE!						Cochrane Iberoamericano	YES	NO	.	.	.	Evidence based medicine	NO
198	Luis Ortiz	Researcher		#VALUE!	Pontificia Universidad Católica de Chile					Cochrane Iberoamericano	YES	NO	.	.	.	Evidence based medicine	NO
197	Universidad Católica de la Santísima Concepción	Institution		#VALUE!						Cochrane Iberoamericano	YES	NO	.	.	.	Evidence based medicine	NO
196	Eva Madrid Aris	Researcher		#VALUE!	Escuela de Medicina de la Universidad de Valparaíso					Cochrane Iberoamericano	YES	NO	.	.	.	Evidence-based medicine only	NO
195	Patricia Marcela Cortés Jofré,	Researcher		#VALUE!	Universidad Católica de la Santísima Concepción					Cochrane Iberoamericano	YES	NO	.	.	.	Evidence based medicine	NO
194	Camila Escobar Liquitay	Researcher		#VALUE!						Cochrane Iberoamericano	YES	NO	.	.	.	Evidence-based medicine only	NO
193	Luis Ignacio Garegnani	Researcher		#VALUE!						Cochrane Iberoamericano	YES	NO	.	.	.	Evidence-based medicine only	NO
192	Edgardo Ábalos	Researcher	Academic	#VALUE!	Centro Rosarino de Estudios Perinatales (CREP)					Cochrane Iberoamericano	YES	YES	NO	YES	NO		YES
191	Agustín Ciapponi	Researcher		#VALUE!	Instituto de Efectividad Clínica y Sanitaria (IECS)					Cochrane Iberoamericano	YES	NO	NO	YES	NO	Evidence-based medicine only	NO
190	Bartolomé Finízola Celli	Researcher		#VALUE!	Asociación Cardiovascular Centroccidental					Cochrane Iberoamericano	YES	NO	.	.	.	Evidence-based medicine only	NO
189	Raquel González Hormostay	Researcher		#VALUE!	Asociación Cardiovascular Centroccidental					Cochrane Iberoamericano	YES	NO	.	.	.	Evidence-based medicine only	NO
188	Asociación Cardiovascular Centroccidental	Institution		#VALUE!						Cochrane Iberoamericano	YES	NO	.	.	.	Evidence-based medicine only	NO
187	Nora Reyes Puma	Researcher	Academic	#VALUE!						Cochrane/LAC Hub	YES	YES	YES	YES	.		YES
186	César Loza Munarriz	Researcher		#VALUE!	Universidad Peruana Cayetano Heredia					Cochrane Iberoamericano	YES	NO	NO	NO	NO	Evidence-based medicine	NO
185	Universidad Peruana Cayetano Heredia	Institution	Academic	#VALUE!						Cochrane Iberoamericano	YES	.	.	.	.	No information	NO
184	Daniel Simancas	Institution		#VALUE!	Fundación Educación, Salud y Sociedad					Cochrane Iberoamericano	YES	NO	YES	.	.	Medicine oriented, not related to policy	NO
183	Ricardo Hidalgo	Researcher		#VALUE!	Facultad de ciencias de la Salud Eugenio Espejo					Cochrane Iberoamericano	YES	NO	YES	.	.	Medicine oriented, not related to policy	NO
182	Universidad UTE	Institution		#VALUE!						Cochrane Iberoamericano	YES	NO	.	.	.	Medicine oriented, not related to policy	NO
181	Martín Cañón	Researcher		#VALUE!	Centro Médico Imbanaco					Cochrane Iberoamericano	YES	NO	.	.	.	Evidence based medicine	NO
180	Centro Médico Imbanaco	Institution		#VALUE!						Cochrane Iberoamericano	YES	NO	.	.	.	Evidence based medicine	NO
179	Juan Carlos Villar	Researcher		#VALUE!	Fundación Cardioinfantil - Instituto de Cardiología					Cochrane Iberoamericano	YES	NO	.	.	.	Evidence based medicine	NO
178	Fundación Cardioinfantil - Instituto de Cardiología	Institution		#VALUE!						Cochrane Iberoamericano	YES	NO	.	.	.	Evidence based medicine	NO
177	Mario F. Delgado-Noguera	Researcher		#VALUE!	Universidad del Cauca					Cochrane Iberoamericano	YES	NO	.	.	.	Evidence based medicine	NO
176	Universidad del Cauca	Institution		#VALUE!						Cochrane Iberoamericano	YES	NO	.	.	.	Evidence based medicine	NO
175	Jorge Antonio Coronado Daza	Researcher		#VALUE!	Universidad de Cartagena					Cochrane Iberoamericano	YES	NO	.	.	.	Evidence based medicine	NO
174	Universidad de Cartagena	Institution		#VALUE!						Cochrane Iberoamericano	YES	NO	.	.	.	Evidence based medicine	NO
173	Guillermo Sánchez Vanegas	Researcher		#VALUE!	Fundación Universitaria Ciencias de la Salud (FUCS)					Cochrane Iberoamericano	YES	NO	.	.	.	Evidence based medicine	NO
172	Fundación Universitaria Ciencias de la Salud (FUCS)	Institution		#VALUE!						Cochrane Iberoamericano	YES	NO	.	.	.	Evidence based medicine	NO
171	Héctor Iván García	Researcher		#VALUE!	Universidad de Antioquia					Cochrane Iberoamericano	YES	NO	.	.	.	Evidence based medicine	NO
170	Edgar Hernández	Researcher		#VALUE!	Universidad Nacional de Colombia					Cochrane Iberoamericano	YES	NO	.	.	.	Evidence based medicine	NO
169	Universidad Nacional de Colombia	Institution	Academic	#VALUE!	Universidad Nacional de Colombia					Cochrane Iberoamericano	YES	YES	.	.	YES		YES
168	Claudia Granados Rugeles	Researcher		#VALUE!	Pontificia Universidad Javeriana					Cochrane Iberoamericano	YES	NO	.	.	.	Evidence based medicine	NO
167	Pontificia Universidad Javeriana	Institution	Academic	#VALUE!						Cochrane Iberoamericano	YES	YES	YES	YES	.		YES
166	Ivan Darío Florez	Researcher	Academic	#VALUE!	Universidad de Antioquia, Mc Master					Cochrane Iberoamericano	YES	YES	YES	YES	YES		YES
165	Unidad de Evidencia y Deliberación para la toma de decisiones	Institution	Academic	#VALUE!	Universidad de Antioquia					Cochrane Iberoamericano	YES	YES	YES	YES	YES	there are many institutions doing it	YES
164	Maricela Piña Pozas	Researcher		#VALUE!	Instituto Nacional de Salud Pública					Cochrane Iberoamericano	YES	NO	YES	YES	NO	Evidence-based medicine only	NO
163	Alan Espinosa Marrón	Researcher		#VALUE!	Universidad Marista de Mérida					Cochrane Iberoamericano	YES	NO	YES	NO	NO	Evidence-based medicine	NO
162	Patricia Elena Clark Peralta	Researcher		#VALUE!	Facultad de Medicina de la Universidad Nacional Autónoma de México					Cochrane Iberoamericano	YES	NO	.	NO	NO	Evidence-based medicine	NO
161	Giordano Pérez Gaxiola	Researcher		#VALUE!	Hospital Pediátrico de Sinaloa "Dr. Rigoberto Aguilar Pico"					Cochrane Iberoamericano	YES	NO	NO	NO	NO	Evidence-based medicine	NO
160	Miguel Villasis-Keever	Researcher	Academic	#VALUE!	Instituto Mexicano del Seguro Social					Cochrane Iberoamericano	YES	YES	.	YES	.		YES
159	Leticia A. Barajas Nava	Researcher		#VALUE!	Hospital Infantil de México Federico Gómez					Cochrane Iberoamericano	YES	NO	NO	NO	NO	Evidence-based medicine	NO
158	Netzahualpilli Delgado Figueroa	Researcher		#VALUE!	Universidad de Guadalajara					Cochrane Iberoamericano	YES	NO	NO	NO	NO	Evidence-based medicine	NO
157	Ismael Aguilar-Salas	Researcher		#VALUE!	Instituto Nacional de Psiquiatría Ramón de la Fuente Muñiz					Cochrane Iberoamericano	YES	NO	NO	NO	NO	Evidence-based medicine	NO
156	Norberto Carlos Chávez Tapia	Researcher		#VALUE!	Fundación Clínica Médica Sur					Cochrane Iberoamericano	YES	NO	NO	NO	NO	Evidence-based medicine	NO
155	International Health Central American Institute (IHCAI)	Institution		#VALUE!						Cochrane Iberoamericano	YES	NO	.	.	.	Medicine oriented, not related to policy	NO
154	Universidad Marista de Mérida	Institution	Academic	#VALUE!						Cochrane Iberoamericano	YES	NO	YES	NO	NO	Evidence-based medicine	NO
153	Hospital Pediátrico de Sinaloa "Dr. Rigoberto Aguilar Pico"	Institution		#VALUE!						Cochrane Iberoamericano	YES	NO	.	.	.	Evidence based medicine	no
152	Hospital Infantil de México Federico Gómez	Institution		#VALUE!						Cochrane Iberoamericano	YES	NO	.	.	.	Evidence based medicine	NO
151	Departamento de Clínicas Médicas	Institution		#VALUE!						Cochrane Iberoamericano	YES	NO	.	.	.	Evidence based medicine	NO
150	Francisco Javier Ballesteros Rodríguez	Researcher		#VALUE!						Cochrane Iberoamericano	NO	NO	.	.	.	Not LATAM	NO
149	Universidad del País Vasco / Euskal Herriko Unibertsitatea	Institution		#VALUE!						Cochrane Iberoamericano	NO	NO	.	.	.	Do not consider LATAM	NO
148	Jesús López Alcalde	Researcher		#VALUE!						Cochrane Iberoamericano	NO	NO	.	.	.	Not LATAM	NO
147	Juan Erviti	Researcher		#VALUE!						Cochrane Iberoamericano	NO	NO	.	.	.	Not LATAM	NO
146	Servicio Navarro de Salud	Institution		#VALUE!						Cochrane Iberoamericano	NO	NO	.	.	.	Do not consider LATAM	NO
145	Instituto Ramón y Cajal de Investigación Sanitaria / Universidad Francisco de Vitoria	Institution		#VALUE!						Cochrane Iberoamericano	NO	NO	.	.	.	Do not consider LATAM	NO
144	Xavier Bonfill	Researcher		#VALUE!						Cochrane Iberoamericano	NO	NO	.	.	.	Not LATAM	NO
143	Centro Asociado de la Fundación Clínica Médica Sur	Institution		#VALUE!						Cochrane Iberoamericano	YES	NO	.	.	.	Evidence-based medicine	NO
142	National Resources Fund (FNR)	Institution	Cooperation	#VALUE!	IHME					Redetsa/Cochrane	YES	YES	.	YES	.	Evaluations	YES
141	Health Assessment Division	Institution	Public	#VALUE!	Ministry of Health					Redetsa	YES	YES	YES	YES	.		YES
140	Institute of Health Technology Assessment and Research—IETSI-ESSALUD	Institution		#VALUE!						Redetsa	YES	NO	YES	NO	NO	Research related to policy, but not for policy	NO
139	National Institute of Health (INS)	Institution	Public	#VALUE!	Ministry of Health			Health		Redetsa/Cochrane	YES	YES	YES	NO	NO		YES
138	Direccion general de Medicamentos, Insumos y Drogas (DIGEMID)	Institution	Public	#VALUE!	Ministry of Health					Redetsa	YES	NO	NO	NO	NO	Farmacovigilancia, no específica en política	NO
137	Ministry of Public Health and Social Welfare	Institution		#VALUE!						Redetsa	YES	.	.	.	.	Not included	NO
136	Ministry of Health	Institution		#VALUE!						Redetsa	YES	.	.	.	.	Not included	NO
135	National Directorate of Drugs of El Salvador (DNM)	Institution		#VALUE!						Redetsa	YES	NO	YES	.	.	Evidence-based medicine	NO
134	Salvadoran Social Insurance Institute (ISSS)	Institution		#VALUE!						Redetsa	YES	.	.	.	.	Web page doesn't work	NO
133	Ministry of Health	Institution		#VALUE!						Redetsa	YES	NO	.	.	.	Not included	NO
132	Superintendent of Health and Labor Risks (SISALRIL)	Institution		#VALUE!						Redetsa	YES	NO	YES	.	.	Not included	NO
131	Directorate of Scientific and Technological Development in Health	Institution	NGO	#VALUE!	Ministry of Health					Redetsa	YES	NO	.	.	.	.	NO
130	Costa Rican Social Security Fund (CCSS)	Institution		#VALUE!						Redetsa	YES	.	YES	.	.	Web page doesn't work	NO
129	Ministry of Health and Social Protection	Institution		#VALUE!						Redetsa	YES	NO	.	.	.	In revision	NO
128	Unidad de Políticas de Salud Informadas por Evidencia	Institution	Public	#VALUE!	Ministry of Health					Redetsa/LAC Hub	YES	YES	YES	YES	YES		YES
127	National Supplementary Health Agency (ANS)	Institution		#VALUE!				Health		Redetsa	YES	.	.	.	.	No information	NO
126	The Collaborating Center of the SUS for Health Technology Assessment and Excellence (CCATES)	Institution	Technical	#VALUE!	Federal University of Minas Gerais (UFMG)			Health	Health technology, health economics	Redetsa	YES	YES	YES	YES	NO		YES
125	National Cardiology Institute (INC)	Institution		#VALUE!						Redetsa	YES	NO	.	.	.	Evidence based medicine	NO
124	Institute of Biomedical Engineering/Federal University of Santa Catarina (IEB/UFSC), WHO/PAHO Collaborating Center	Institution		#VALUE!						Redetsa	YES	NO	.	.	.	Evidence based medicine	NO
123	Health Technology Assessment Center – Syrian-Lebanese Institute forTeaching and Research – Syrian Lebanese Hospital	Institution		#VALUE!						Redetsa	YES	NO	.	.	.	Evidence based medicine	NO
122	National Committee for Incorporation of Technology (CONITEC) in the Unified Health System (SUS)	Institution	Technical	#VALUE!						Redetsa	YES	YES	YES	NO	NO		YES
121	National Health Surveillance Agency (ANVISA)	Institution	Public	#VALUE!						Redetsa	YES	YES	YES	NO	.		YES
120	Ministry of Health	Institution	Public	#VALUE!						Redetsa	YES	.	.	.	.	No information	NO
119	Bermuda Health Council	Institution	Public	#VALUE!						Redetsa	YES	YES	.	YES	.	Makes a follow up, evaluation, reports.	YES
118	Argentina Public Network of Health Technology Assessment (RedArets)	Institution	Public	#VALUE!	Ministry of Health			Education, Human Rights, Social Policy, Gender Equality, Indigenous and Intercultural Education, Youth and Citizenship, Public Policy and Governanc		Redetsa	YES	YES	.	YES	.		YES
117	Comisión Nacional de Evaluación de Tecnologías de Salud (CONETEC)	Institution	Public	#VALUE!						Redetsa	YES	YES	YES	YES	.		YES
116	University Center for Pharmacology of the National University of La Plata (CUFAR).	Institution		#VALUE!						Redetsa	YES	NO	.	.	.	Hace investigación no especifica para EIP	NO
115	Instituto de Evaluación Tecnológica en Salud	Institution	Technical	#VALUE!						INAHTA/REDETSA/LAC Hub	YES	YES	YES	YES	.		YES
114	University of Kansas	Institution		#VALUE!				Community Health and Development		EVIPNET	NO	NO	.	.	.	Not focused on policy but evidence only.	NO
113	University of North Carolina School of Public Health	Institution		#VALUE!				Research Evidence for Sexual and Reproductive Health Quality and Safety Education in Nursing and Midwifery		EVIPNET	NO	NO	.	.	.	Not focused on policy but evidence only.	NO
112	State University of New York at Buffalo	Institution		#VALUE!				Research on Healthy Settings		EVIPNET	NO	NO	.	.	.	Not focused on policy but evidence only.	NO
111	University of Colorado School of Public Health	Institution		#VALUE!				Promoting Family and Child Health		EVIPNET	NO	NO	.	.	.	Not focused on policy but evidence only.	NO
110	New York University	Institution		#VALUE!				Gerontological Nursing Education Quality-Improvement, Evidence-Based Dentistry		EVIPNET	NO	NO	.	.	.	Not focused on policy but evidence only.	NO
109	Food and Drug Administration (FDA)	Institution		#VALUE!				Biological Standardization		EVIPNET	NO	NO	.	.	.	Not focused on policy but evidence only.	NO
108	Public Health Institute	Institution		#VALUE!				Alcohol Epidemiology and Injury		EVIPNET	NO	NO	.	.	.	Not LATAM	NO
107	Columbia University College of Physicians and Surgeons	Institution		#VALUE!				Capacity Building and Training in Global Mental Health		EVIPNET	NO	NO	.	.	.	Evidence-based medicine	NO
106	University of Michigan	Institution		#VALUE!				Research and Clinical Training in Health Promotion Nursing		EVIPNET	NO	.	.	.	.	No information	NO
105	State University of New York at Albany	Institution		#VALUE!				Environmental Health		EVIPNET	NO	.	.	.	.	No information	NO
104	Oak Ridge Institute for Science & Education (ORISE)	Institution		#VALUE!				Radiation Emergency Assistance		EVIPNET	NO	.	.	.	.	No information	NO
103	Loma Linda University	Institution		#VALUE!				Training and Community Mental Health		EVIPNET	NO	.	.	.	.	No information	NO
102	University of Alabama at Birmingham (UAB)	Institution		#VALUE!				International Nursing		EVIPNET	NO	.	.	.	.	No information	NO
101	Columbia University	Institution		#VALUE!				Advanced Practice Nursing		EVIPNET	NO	.	.	.	.	No information	NO
100	University of California	Institution		#VALUE!				Tobacco Control Policy Development		EVIPNET	NO	.	.	.	.	No information	NO
99	Boston University School of Public Health	Institution		#VALUE!				Pharmaceutical Policy		EVIPNET	NO	NO	.	.	.	Not LATAM	NO
98	Stanford University School of Medicine	Institution		#VALUE!				Antimicrobial Resistance and Stewardship		EVIPNET	NO	NO	.	.	.	Evidence-based medicine	NO
97	University of Illinois	Institution		#VALUE!				Information Systems for Health International Nursing Development in Primary Health Care Occupational and Environmental Health Herbal Medicines		EVIPNET	NO	.	.	.	.	No information	NO
96	North Carolina State University	Institution		#VALUE!				Global One Health and Antimicrobial Resistance Initiatives		EVIPNET	NO	.	.	.	.	No information	NO
95	University of Illinois at Rockford	Institution		#VALUE!				Medical Education and Primary Health Care		EVIPNET	NO	.	.	.	.	No information	NO
94	University of Texas Medical Branch (UTMB)	Institution		#VALUE!				Nursing and Midwifery Leadership Aging and Health Vaccine Research, Evaluation and Training on Emerging Infectious Diseases		EVIPNET	NO	.	.	.	.	No information	NO
93	University of Miami	Institution		#VALUE!				Ethics and Global Health Policy Nursing Human Resources Development and Patient Safety		EVIPNET	NO	.	.	.	.	No information	NO
92	University of Pennsylvania	Institution		#VALUE!				Nursing and Midwifery Leadership		EVIPNET	NO	.	.	.	.	No information	NO
91	Stanford University	Institution		#VALUE!				Classifications, Terminologies and Standards		EVIPNET	NO	.	.	.	.	No information	NO
90	National Center for Healthy Housing	Institution		#VALUE!				Research and Training on Housing Related Disease and Injury Prevention		EVIPNET	NO	.	.	.	.	No information	NO
89	St. Jude Children's Research Hospital	Institution		#VALUE!				Childhood Cancer Ecology of Influenza in Animals		EVIPNET	NO	.	.	.	.	No information	NO
88	NSF International	Institution		#VALUE!				Water and Indoor Air Quality and Food Safety		EVIPNET	NO	.	.	.	.	No information	NO
87	National Institutes of Health (NIH)	Institution		#VALUE!				Environmental Health Sciences Emerging Infectious Disease Response Research and Preparedness Global Cancer Control		EVIPNET	NO	.	.	.	.	No information	NO
86	University of South Florida	Institution		#VALUE!				Onchocerciasis Diagnostics Social Marketing and Social Change to Address Non-Communicable Diseases		EVIPNET	NO	.	.	.	.	No information	NO
85	Fred Hutchinson Cancer Reserch Center	Institution		#VALUE!				Inference and Dynamics of Infectious Diseases		EVIPNET	NO	.	.	.	.	No information	NO
84	Yale New Haven Health	Institution		#VALUE!				Emergency Preparedness and Disaster Response		EVIPNET	NO	.	.	.	.	No information	NO
83	University of New Mexico Health Sciences Center	Institution		#VALUE!				Innovative Health Workers Education, Service and Research Models		EVIPNET	NO	.	.	.	.	No information	NO
82	Mayo Clinic	Institution		#VALUE!				digital health and precision medicine for tuberculosis		EVIPNET	NO	.	.	.	.	No information	NO
81	University of Maryland Baltimore - School of Medicine	Institution		#VALUE!				Occupational Health		EVIPNET	NO	.	.	.	.	No information	NO
80	University of California, San Francisco	Institution		#VALUE!				Emergency, Critical and Operative Care		EVIPNET	NO	.	.	.	.	No information	NO
79	Department of International Health	Institution	Academic	#VALUE!	Johns Hopkins University			Research and Policy Guidance in Humanitarian Health Assistance Nursing Information, Knowledge Management and Sharing Epidemiology and Evaluation Injuries, Violence and Accident Prevention Global Health Security Tobacco Control Surveillance and Evaluation		EVIPNET	YES	YES	NO	YES	.		YES
78	Harvard Medical School	Institution	Academic	#VALUE!				development of surgical care systems policy		EVIPNET	NO	.	.	.	.	No information	NO
77	University of Vermont	Institution		#VALUE!				Health Technology Management		EVIPNET	NO	.	.	.	.	No information	NO
76	Georgetown University	Institution		#VALUE!				Global Health Law		EVIPNET	NO	.	.	.	.	No information	NO
75	University of North Carolina at Chapel Hill	Institution		#VALUE!				Water and Sanitation		EVIPNET	NO	.	.	.	.	No information	NO
74	Centers for Disease Control and Prevention (CDC)	Institution	Public	#VALUE!				Smallpox and Other Poxvirus Infections Reference and Research on Rabies Surveillance, Epidemiology & Control of Influenza Viral Hemorrhagic Fevers Dracunculiasis Eradication Injury Control Sexually Transmitted Infections Prevention meningitis Bacterial Vector-Borne Diseases Biosafety and Biosecurity Streptococcus Infections Arthropod-Borne Viruses Reference and Research WHO Family of Internationa…		EVIPNET	NO	YES	YES	YES	.		YES
73	Laboratorio Tecnologico del Uruguay (LATU)	Institution	Public	#VALUE!				Food Analysis		EVIPNET	YES	YES	.	YES	YES	.	YES
72	Universidad de la República	Institution		#VALUE!				Human Environmental Toxicology		EVIPNET	YES	NO	.	.	.	rEsearch related to policy, but not for policy	NO
71	Centro Nacional de Excelencia Tecnológica en Salud - CENETEC	Institution	Public	#VALUE!	Ministry of Health			WHO Collaborating Centre in Health Technology		EVIPNET/REDETSA	YES	YES	YES	YES	.		YES
70	Instituto Nacional de Geriatria	Institution	Public	#VALUE!	Ministry of Health			Integrated Care for Healthy Ageing		EVIPNET	YES	NO	YES	NO	NO	Medicine oriented, not related to policy	NO
69	Instituto Mexicano del Seguro Social (IMSS)	Institution	Public	#VALUE!	Ministry of Health			Resilient Health Services		EVIPNET	YES	NO	YES	.	.	Medicine oriented, not related to policy	NO
68	Ministry of Health	Institution		#VALUE!				Family of International Classifications		EVIPNET	YES	.	.	.	.	not included	NO
67	Secretaria de Salud de Mexico	Institution		#VALUE!				Quality of Care in Health Service Delivery		EVIPNET	YES	.	.	.	.	Not included	NO
66	National Institute of Psychiatry "Ramon de la Fuente Muniz"	Institution		#VALUE!				Research and Training in Mental Health and Substance Abuse		EVIPNET/Cochrane	YES	NO	.	.	.	Evidence based medicine	NO
65	Universidad Nacional Autónoma de México	Institution	Academic	#VALUE!				Development of Professional Nursing		EVIPNET/Cochrane	YES	YES	YES	.	.	Existe registro pero no explícito	YES
64	Instituto Nacional de Salud Pública	Institution	Public	#VALUE!	Ministry of Health			Research and Training in Environmental Epidemiology		EVIPNET/Cochrane/LAC Hub	YES	YES	YES	NO	.	Evaluación de programas	YES
63	Servicio Nacional de Sanidad. Inocuidad y Calidad Agroalimentaria (SENASICA)	Institution	Public	#VALUE!				Antimicrobial Resistance in Foodborne and Environmental Bacteria		EVIPNET	YES	NO	NO	NO	NO	Research related to policy, but not for policy	NO
62	Universidad Autónoma de San Luis Potosí (UASLP)	Institution	Academic	#VALUE!				Health Risk Assessment and Children's Environmental Health		EVIPNET	YES	NO	NO	NO	NO	Evidence based medicine	NO
61	Instituto de Diagnóstico y Referencia Epidemiológicos (InDRE) “Dr. Manuel Martínez Báez”,	Institution	Public	#VALUE!	Ministry of Health			Laboratory Biosafety Arboviruses Laboratory Quality Management Training on Malaria Microscopy Diagnosis		EVIPNET	YES	NO	NO	NO	NO	Epidemiology and laboratory related	NO
60	School of Public Health, Medical Sciences Campus, University of Puerto Rico	Institution		#VALUE!				Training and Research in Health Promotion and Health Education		EVIPNET	NO	NO	.	.	.	Evidence-based medicine	NO
59	Seguro Social de Salud del Peru (EsSalud)	Institution	Public	#VALUE!				Traditional and Complementary Medicine		EVIPNET	YES	NO	NO	NO	NO	Prestadora de servicios	NO
58	University of the West Indies	Institution	Academic	#VALUE!				Nursing and Midwifery Development in the Caribbean		EVIPNET	YES	YES	YES	.	.	It is located in many caribbean countries and its activities are not specified.	YES
57	Centro de Investigaciones sobre Longevidad, Envejecimiento y Salud (CITED)	Institution		#VALUE!				Public Health and Aging		EVIPNET	YES	NO	.	.	.	Only services	NO
56	Instituto de Medicina Tropical “Pedro Kourí” (IPK)	Institution	Public	#VALUE!				Tuberculosis Elimination Study and Control of Dengue		EVIPNET/Cochrane	YES	YES	.	YES	.		YES
55	Universidad de la Habana	Institution	Academic	#VALUE!				Communication Strategies and Social Network Content		EVIPNET	YES	YES	YES	.	.		YES
54	Centro para el Control Estatal de Medicamentos, Equipos y Dispositivos Médicos (CECMED)	Institution		#VALUE!				Regulation of Health Technologies		EVIPNET	YES	NO	.	.	.	Regulator and medicine	NO
53	Ministerio de Salud Pública	Institution		#VALUE!				Knowledge Management and Communication		EVIPNET/REDETSA	YES	NO	.	.	.	Evidence based medicine	NO
52	Hospital Gustavo Alderegia Lima	Institution		#VALUE!				Hospital Organization, Management and Quality		EVIPNET	YES	NO	.	.	.	Evidence based medicine	NO
51	Instituto Nacional de Higiene, Epidemiologia y Microbiologia (INHEM)	Institution		#VALUE!				Health in Housing		EVIPNET	YES	NO	.	.	.	Evidence based medicine	NO
50	National Intsitute of Workers' Health, Ministry of Health	Institution	Public	#VALUE!				Occupational Health		EVIPNET	YES	YES	YES	YES	.		YES
49	St. George's University, School of Medicine	Institution		#VALUE!				Environmental and Occcupational Health		EVIPNET	YES	NO	.	.	.	Evidence-based medicine	NO
48	Instituto de Investigaciones Económicas y Sociales (IIES)	Institution	Academic	#VALUE!	Universidad Nacional Autónoma de Honduras (UNAH)					EVIPNET	YES	NO	NO	NO	NO	Research related to policy, but not for policy	NO
47	Insituto Costarricense de Investigacion y Enseñanza en Nutricion y Salud (INCIENSA)	Institution		#VALUE!				Antimicrobial Resistance (AMR) Surveillance		EVIPNET	YES	NO	.	.	.	Biology and medicine oriented	NO
46	Instituto de Salud Pública	Institution	Public	#VALUE!				Occupational Health		EVIPNET/REDETSA	YES	YES	YES	.	.		YES
45	Pontificia Universidad Católica de Chile	Institution	Academic	#VALUE!				Health Services and Nursing Development for Noncommunicable Disease Care		EVIPNET/Cochrane/LAC Hub	YES	YES	YES	YES	.		YES
44	Universidad de Chile	Institution		#VALUE!				Development of Midwifery		EVIPNET/LATAM Hub	YES	NO	.	.	.	Evidence based medicine	NO
43	Universidad del Desarrollo	Institution		#VALUE!				International Health Regulations (IHR)		EVIPNET/Cochrane	YES	NO	.	.	.	Evidence based medicine	NO
42	Liga Chilena contra la Epilepsia (Chilean League against Epilepsy)	Institution		#VALUE!				Education and Service Development for People with Epilepsy		EVIPNET	YES	NO	.	.	.	Evidence based medicine	NO
41	Facultad de Medicina Clínica Alemana - Universidad del Desarrollo	Institution		#VALUE!				Bioethics		EVIPNET	YES	NO	.	.	.	Evidence based medicine	NO
40	El Bosque University	Institution		#VALUE!				Centre for Occupational Health		EVIPNET	YES	NO	.	.	.	No register of EIP, only research	NO
39	Universidad Industrial de Santander	Institution		#VALUE!				Health Promotion and Sexual and Reproductive Health		EVIPNET	YES	NO	.	.	.	No register of EIP, only research	NO
38	Centro Internacional de Entrenamiento e Investigaciones Médicas (CIDEIM)	Institution		#VALUE!				leishmaniasis control		EVIPNET	YES	NO	.	.	.	No register of EIP, only research	NO
37	YORK UNIVERSITY	Institution		#VALUE!				Global Governance of Antimicrobial Resistance		EVIPNET	NO	NO	.	.	.	Evidence-based medicine	NO
36	University of Calgary	Institution		#VALUE!				Classification, Terminology and Standards		EVIPNET	NO	NO	.	.	.	Evidence-based medicine	NO
35	Institut national de santé publique du Québec	Institution		#VALUE!				Safety Promotion and Injury Prevention		EVIPNET	NO	NO	.	NO	NO	Not related	NO
34	McMaster Health Forum	Institution	Academic	#VALUE!	McMaster University			Infectious Diseases, Research Methods and Recommendations. Evidence-Informed Policy.		EVIPNET	YES	YES	YES	YES	YES		YES
33	University of Calgary	Institution		#VALUE!				Prevention and Control of Chronic Kidney Disease		EVIPNET	YES	NO	.	.	.	Evidence-based medicine	NO
32	University of Sherbrooke	Institution		#VALUE!				Health Science Education and Practice		EVIPNET	NO	NO	.	NO	NO	Not related	NO
31	University of Toronto	Institution		#VALUE!				Family Medicine and Primary Care Bioethics		EVIPNET	NO	NO	.	NO	NO	Not related	NO
30	University of British Columbia	Institution		#VALUE!				Occupational and Environmental Health		EVIPNET	NO	NO	.	.	.	Evidence-based medicine	NO
29	Global Governance Research-to-Practice Lab	Institution	Technical	#VALUE!	McGill University			tuberculosis research Research and Training in Mental Health		EVIPNET	YES	YES	.	YES	.		YES
28	Université de Montréal	Institution		#VALUE!				Nutrition Changes and Development		EVIPNET	NO	NO	.	.	.	Evidence-based medicine	NO
27	Centre intégré universitaire de santé et de services sociaux de l’Estrie – Centre hospitalier universitaire de Sherbrooke	Institution		#VALUE!				Age-friendly Cities and Communities		EVIPNET	NO	NO	.	.	.	Evidence-based medicine	NO
26	Federal University of Pelotas	Institution	Academic	#VALUE!				Health Equity Monitoring		EVIPNET	YES	.	.	.	.	No much information about	NO
25	Instituto Nacional de Câncer José Alencar Gomes da Silva (INCA)	Institution		#VALUE!				Tobacco Control		EVIPNET	YES	NO	.	.	.	Evidence based medicine	NO
24	Universidade do Estado do Rio de Janeiro (UERJ)	Institution	Academic	#VALUE!				Health Workforce Planning and Information		EVIPNET	YES	YES	YES	.	.		YES
23	Prefeitura de Sao Paulo	Institution		#VALUE!				Training and Research in Urban Zoonoses Control		EVIPNET	YES	.	.	.	.	not included	NO
22	Fundação de Dermatologia Tropical e Venereologia "Alfredo da Matta" (FUAM)	Institution		#VALUE!				Control, Training and Research of Leprosy in the Americas		EVIPNET	YES	NO	YES	NO	NO	Evidence based medicine	NO
21	Instituto Lauro de Souza Lima	Institution		#VALUE!				Training of Personnel in the Control & Research of Leprosy, mainly for Portuguese-Speaking Countries		EVIPNET	YES	NO	.	.	.	not included	NO
20	Secretaria de Estado da Saude de Sao Paulo	Institution		#VALUE!				Rabies		EVIPNET	YES	.	.	.	.	not included	NO
19	University of São Paulo	Institution	Academic	#VALUE!				Nursing Research Development Healthy Cities and Health Promotion Research on Violence Prevention		EVIPNET	YES	YES	YES	YES	.	Not much information	YES
18	Fundação Oswaldo Cruz (FIOCRUZ)	Institution	Technical	#VALUE!				Environmental and Public Health Global Health and South-South Collaboration Pharmaceutical Policies Leptospirosis Strengthen Human Milk Banks Education of Health Technicians		EVIPNET	YES	YES	YES	YES	YES		YES
17	Fundação Pro-Sangue-Hemocentro de São Paulo (FPS/HSP)	Institution		#VALUE!				Quality Control of Serology in Blood Banks		EVIPNET	YES	NO	.	.	.	Evidence based medicine	NO
16	Universidad Federal de Santa Catarina	Institution	Academic	#VALUE!	EVIPNET			Heathcare Technology Management		EVIPNET	YES	.	.	.	.	No information	NO
15	Consejo Nacional de Investigaciones Científicas y Técnicas (CONICET)	Institution	Public	#VALUE!	Ministry of Science, Technology and innovation			Insecticide Resistance and Insecticide Research on Chagas and Dengue Vectors		EVIPNET	YES	YES	YES	YES	.		YES
14	Unidad de Investigación y Desarrollo Estratégicos para la Defensa (UNIDEF)	Institution	Public	#VALUE!	Ministry of Defense			Insecticide Resistance and Insecticide Research on Chagas and Dengue Vectors		EVIPNET	YES	YES	YES	YES	.		YES
13	Administración Nacional de Laboratorios e Institutos de Salud “Dr Carlos Malbrán” (ANLIS)	Institution		#VALUE!				Research, Referential Diagnosis, Biological Production & Training in Chagas & Parasitic Diseases		EVIPNET	YES	.	.	.	.	No information	NO
12	Universidad Nacional de la Plata	Institution		#VALUE!				Rational Use of Medicines		EVIPNET	YES	.	.	.	.	No information	NO
11	Administración Nacional de Laboratorios e Institutos de Salud (ANLIS)	Institution		#VALUE!				Reference and Research of Arbovirus and Hemorrhagic Fevers Virosis		EVIPNET	YES	.	.	.	.	No information	NO
10	Centro Rosarino de Estudios Perinatales (CREP)	Institution		#VALUE!				Research in Human Reproduction		EVIPNET/Cochrane	YES	NO	.	.	.	Solo hace traduccion.	NO
9	Administración Nacional de Laboratorios e Institutos de Salud “Dr Carlos Malbrán” (ANLIS)	Institution		#VALUE!				Antimicrobial Resistance Surveillance		EVIPNET	YES	.	.	.	.	No information	NO
8	Ministry of Health of Santiago del Estero Province	Institution		#VALUE!				Chagas Disease Clinic and Medical Care		EVIPNET	YES	.	.	.	.	No information	NO
7	Comisión Nacional de Evaluación de Tecnologías de Salud	Institution	Technical	#VALUE!				Family of International Classifications		Web Page	YES	YES	YES	YES	.		YES
6	Administración Nacional de Laboratorios e Institutos de Salud (ANLIS)	Institution		#VALUE!				Epidemology		EVIPNET	YES	.	.	.	.	No information	NO
5	Hospital Italiano de Buenos Aires	Institution		#VALUE!				Knowledge management		EVIPNET/Cochrane	YES	.	.	.	.	No information	NO
4	INSTITUTO DE EFECTIVIDAD CLÍNICA Y SANITARIA (IECS)	Institution	Technical	#VALUE!				Health technology assessment		EVIPNET/REDETSA/Cochrane/INAHTA	YES	YES	YES	YES	.		YES
3	FLACSO	Institution	Cooperation	#VALUE!				Education, Democracy and Governance, Human Rights and Gender Equality, Social Policy and Inequality, Security and Peacebuilding, Migration, Environment and Climate Change, Public Administration and State Reform		EVIPNET	YES	YES	YES	YES	NO		YES
2	CEPAL	Institution	Cooperation	International Institution				SDG 2030 Gender Statistics International trade and integration Economic Development Social Development Sustainable Development and Human Settlements Planning for Development Population and development Natural Resources		EVIPNET	YES	YES	YES	YES	YES	https://www.cepal.org/es/catalogo-publicaciones	YES
1	OECD	Institution	Cooperation	International Institution				Agriculture and food Development Economics Finance and Investment Governance Social issues/Migration/health Taxation Trade Education Employment Energy Industry and services Nuclear energy Science and Technology Transport Urban rural and regional development		EVIPNET	YES	YES	YES	YES	YES	https://www.oecd-ilibrary.org/papers/2021?pageSize=60	YES

## Sheet: Sheet1
	INSTITUTIONS							INSTITUTIONS
		TOTAL	STRONG	INTERMEDIATE	WEAK	SUM			STRONG			INTERMEDIATE					WEAK						STRONG	INTERMEDIATE	WEAK	SUM
	Argentina	8		6	2	8	0	Brazil	9			Partnership+products	Partnership+activities	total			Partnership	Products	Activities	total		Brazil	9	6	16	31
	Bermuda	1			1	1	0	Canada	2		Argentina	6		6		Argentina		2		2		Argentina		6	2	8
	Bolivia	2		1	1	2	0	Chile	2		Bolivia		1	1		Bermuda		1		1		Colombia	1	3	3	7
	Brazil	31	9	6	16	31	0	Colombia	1		Brazil	6		6		Bolivia		1		1		Mexico		3	3	6
	Canada	3	2		1	3	0	International Institution	6		Chile	2		2		Brazil	13	1	1	15		Honduras		3		3
	Chile	7	2	2	3	7	0	Jamaica	1		Colombia	3		3		Canada		1		1		Chile	2	2	3	7
	Colombia	7	1	3	3	7	0	Trinidad and Tobago	1		Costa Rica		2	2		Chile	1	1		2		Uruguay	1	2	1	4
	Costa Rica	2		2		2	0				Cuba	1		1		Colombia		1	2	3		Costa Rica		2		2
	Cuba	4		1	3	4	0				Honduras	3		3		Cuba		1	1	2		Cuba		1	3	4
	Ecuador	1			1	1	0				International Institution	2		2		Ecuador			1	1		Bolivia		1	1	2
	Honduras	3		3		3	0				Mexico	1	2	3		Jamaica	1			1		Trinidad and Tobago	1		2	3
	International Institution	8	6	2		8	0				Uruguay	1	1	2		Mexico	2	1		3		Canada	2		1	3
	Jamaica	2	1		1	2	0									Trinidad and Tobago		1		1		Jamaica	1		1	2
	Mexico	6		3	3	6	0									Peru	1			1		Bermuda			1	1
	Peru	1			1	1	0									Trinidad and Tobago	1			1		Ecuador			1	1
	Trinidad and Tobago	3	1		2	3	0									United States		1		1		Peru			1	1
	United States	1			1	1	0									Uruguay		1		1
	Uruguay	4	1	2	1	4	0
						0	0																17	29	39	85
	ACTORS	TOTAL	STRONG	INTERMEDIATE	WEAK	SUM
	Argentina	5	2		3	5
	Bolivia	3		2	1	3			STRONG			INTERMEDIATE					WEAK					ACTORS	STRONG	INTERMEDIATE	WEAK	SUM
	Brazil	9	4	5		9		Argentina	2			Partnership+products	Partnership+activities	total			Partnership	Products	Activities	total		Brazil	4	5		9
	Chile	6	4		2	6		Colombia	3		Bolivia	2	1	3		Argentina		1	2	3		Colombia	3	2		5
	Colombia	5	3	2		5		Trinidad and Tobago	1		Brazil	5	1	6		Brazil		1		1		Bolivia		2	1	3
	Jamaica	1		1		1		United States	1		Colombia	2		2		Chile		2		2		Jamaica		1		1
	Mexico	2		1	1	2		Uruguay	1		Jamaica	1		1		Mexico		1		1		Mexico		1	1	2
	Peru	1		1		1					Mexico	1		1		Venezuela		1		1		Peru		1		1
	Trinidad and Tobago	1	1			1					Peru	1		1								Canada	1	0	0	1
	United States	1	1			1																Chile	4		2	6
	Uruguay	1	1			1																Argentina	2		3	5
	Venezuela	1			1	1																Trinidad and Tobago	1			1
																						Uruguay	1			1
																						Venezuela			1	1
																						Total	16	12	8	36
