# Supplementary material
Source: Research Square preprint supplement (doi:10.21203/rs.3.rs-8695811/v1)
Supplement: Supplementary file 1 [file c3daae870db551951fa94487.docx]

Appendix 1

Results of number of actors’ engagement in Evidence-Informed policymaking per country

- - 1. **Institutions***

| **Country** | **Strong** | **Intermediate** | **Weak** | **Total** |
| --- | --- | --- | --- | --- |
| Brazil | 9 | 6 | 16 | 31 |
| Argentina |  | 6 | 2 | 8 |
| Colombia | 1 | 3 | 3 | 7 |
| Mexico |  | 3 | 3 | 6 |
| Honduras |  | 3 |  | 3 |
| Chile | 2 | 2 | 3 | 7 |
| Uruguay | 1 | 2 | 1 | 4 |
| Costa Rica |  | 2 |  | 2 |
| Cuba |  | 1 | 3 | 4 |
| Bolivia |  | 1 | 1 | 2 |
| Trinidad and Tobago | 1 |  | 2 | 3 |
| Jamaica | 1 |  | 1 | 2 |
| Bermuda |  |  | 1 | 1 |
| Ecuador |  |  | 1 | 1 |
| Peru |  |  | 1 | 1 |
| **Total** | **17** | **29** | **39** | **85** |

* Without considering international institutions and United States and Canada.

- - 1. **Researchers**

| **Country** | **Strong** | **Intermediate** | **Weak** | **Total** |
| --- | --- | --- | --- | --- |
| Brazil | 4 | 5 |  | 9 |
| Colombia | 3 | 2 |  | 5 |
| Bolivia |  | 2 | 1 | 3 |
| Jamaica |  | 1 |  | 1 |
| Mexico |  | 1 | 1 | 2 |
| Peru |  | 1 |  | 1 |
| Chile | 4 |  | 2 | 6 |
| Argentina | 2 |  | 3 | 5 |
| Trinidad and Tobago | 1 |  |  | 1 |
| Uruguay | 1 |  |  | 1 |
| Venezuela |  |  | 1 | 1 |
| **Total** | **16** | **12** | **8** | **36** |
